# Supplementary material for: Coordinated nuclease activities counteract Ku at single-ended DNA double-strand breaks
Source: PubMed Central journal article supplement (PMC5031800; doi:10.1038/ncomms12889), 2016-09-19
Supplement: ncomms12889-s1.pdf [file ncomms12889-s1.pdf]

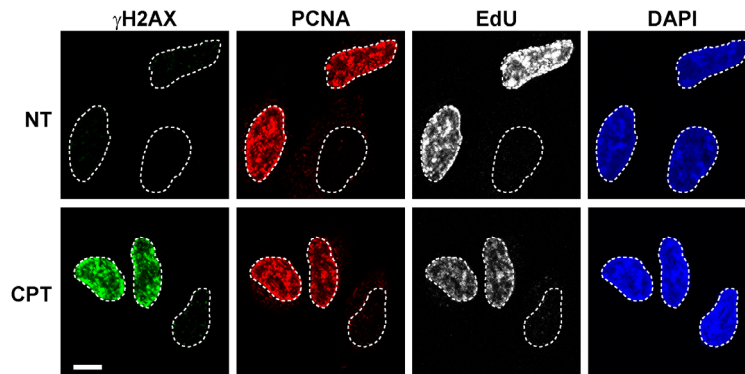

**Supplementary : igure 1: CPT induces DSBs specifically in replicating cells that are identifiable by PCNA staining.** CPT induces DSBs in replicating cells detected by EdU or PCNA staining after CSK+R pre-extraction. White scale bar = 10  $\mu$ m.

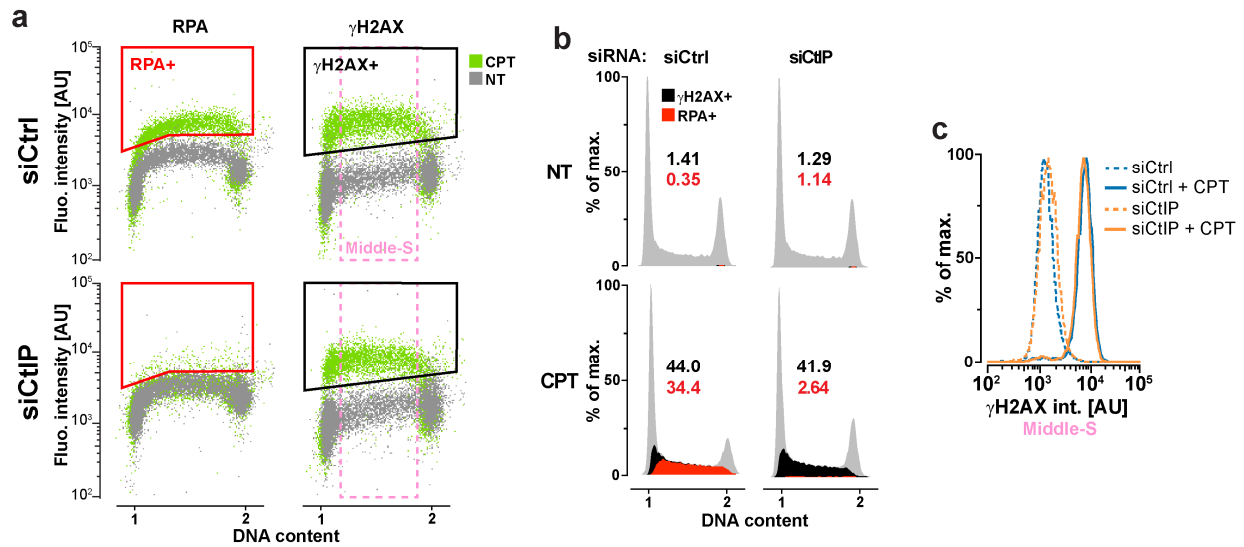

**Supplementary : figure 2: CtIP depletion blocks DNA resection without impact on DNA damage production by CPT.** (a) U2OS cells were transfected with the indicated siRNA, treated with CPT and processed for analysis of  $\gamma$ H2AX induction and RPA32 association with chromatin through flow cytometry. The red and black boxes represent the gates used to select RPA positive (RPA+) and  $\gamma$ H2AX positive ( $\gamma$ H2AX+) cells respectively. The dashed pink box represents the gate used to select cells in middle S phase in which quantification of  $\gamma$ H2AX induction presented in **c** were performed. (b) Histogram representation of the data presented in **a**. Back and red numbers represent the percentage of  $\gamma$ H2AX and RPA32 positive cells, respectively. (c) Depletion of CtIP does not impact on the level of DNA damage generated by CPT as revealed by histograms of  $\gamma$ H2AX fluorescence intensity.

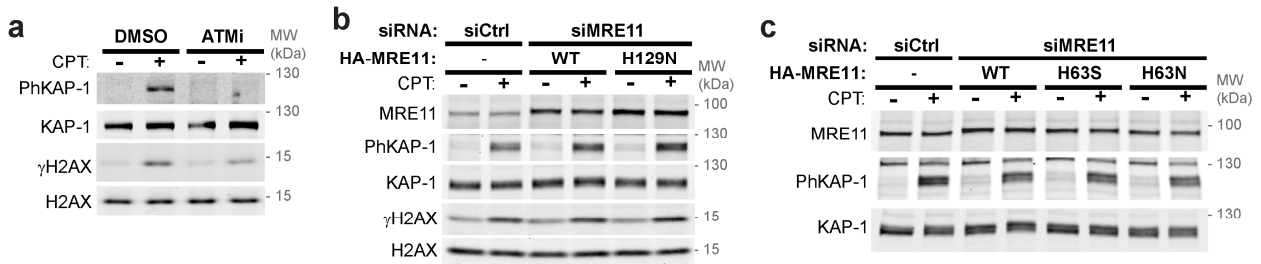

**Supplementary : igure 3: ATM-dependent KAP-1 S824 phosphorylation is unaffected**

**by H129N, H63S and H63N MRE11 mutations.** (a) U2OS cells were treated with CPT in presence of DMSO or ATMi. (b) Immunoblotting of extracts from U2OS T-REx stably transfected with control or siRNA-resistant wild-type or H129N HA-MRE11 expressing plasmids, transfected with the indicated siRNA and treated with CPT. (c) Immunoblotting of extracts from U2OS T-REx stably transfected with control or siRNA-resistant wild-type, H63S or H63N HA-MRE11 expressing plasmids, transfected with the indicated siRNA and treated with CPT.

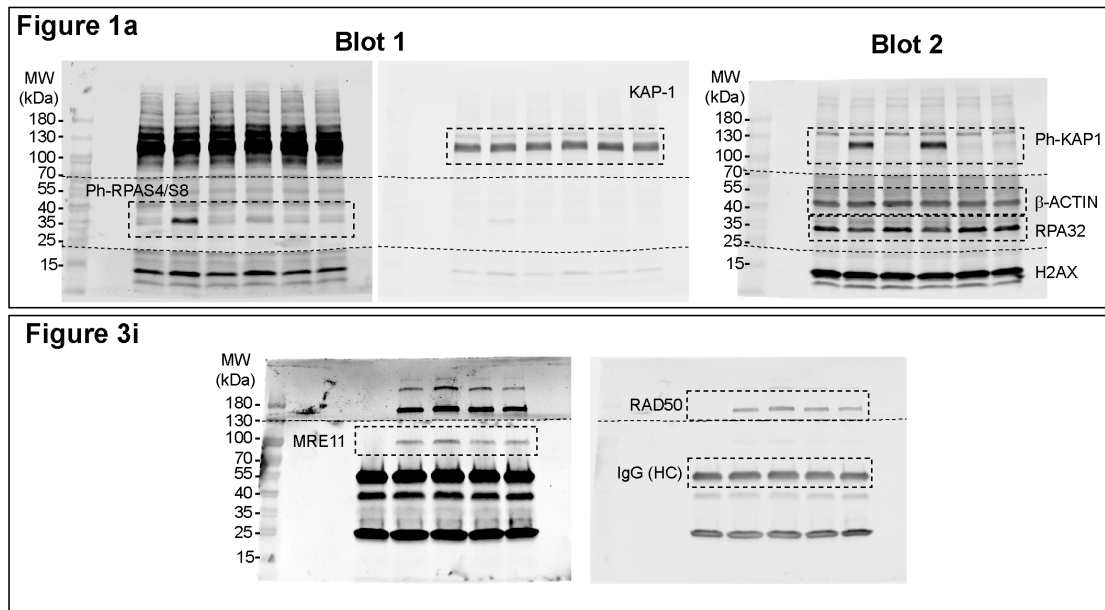

#### Supplementary : figure 4: Un-cropped scans.

Each panel represents full-length un-cropped blots of the indicated figure. Horizontal dashed lines represent the different stripes of the membranes. When necessary, the same extracts were analyzed onto two different blots as indicated, each including a loading control. The dashed boxes represent the approximate cropped regions displayed in the article.



## List of siRNAs used in this study

| Target                       | Target sequence     |
|------------------------------|---------------------|
| Control (Firefly luciferase) | CGUACGCGGAAUACUUCGA |
| CtIP                         | GCUAAAACAGGAACGAAUC |
| MRE11 (3'UTR)                | GAGCAUAACUCCAUAAGUA |
| Ku70                         | GAGUGAAGAUGAGUUGACA |

**Supplementary Table 1: List of siRNAs used in this study.** All siRNAs are terminated by dTdT and are from Sigma-Aldrich.

## List of DNA oligonucleotides used in this study

| Name                 | Sequence 5' to 3'                                             | Restriction site(s)     |
|----------------------|---------------------------------------------------------------|-------------------------|
| <b>ExoProbe-S</b>    | *GGGTGAACCTGCAGGTGGGCAAAGATGTCCTAGCAAGGCACTGGTAGAATTCGGCAGCGT |                         |
| <b>ExoProbe-AS</b>   | ACGCTGCCGAATTCTACCAGTGCCTTGCTAGGACATCTTTGCCACCTGCAGGTTACCC    |                         |
| <b>HA1-S</b>         | AGCTTGCGGCCCGCCGCCACCATGTACCCCTACGATGTGCCTGACTACGCCG          | HindIII NotI BamHI      |
| <b>HA1-AS</b>        | GATCCGGCGTAGTCAGGCACATCGTAGGGGTACATGGTGGCGGCCGCCGCA           | HindIII NotI BamHI      |
| <b>CtIP-F</b>        | GCGGGATCCATGAACATCTCGGAAGCAGCTGTGG                            | BamHI                   |
| <b>CtIP-R</b>        | GGCACGCGTTTATGTCTTCTGCTCCTTGCCTTTTGG                          | MluI                    |
| <b>CtIP-S664A-F</b>  | CCGGGAGCAGACCTTGCTCAGTATAAAATGG                               |                         |
| <b>CtIP-S664A-R</b>  | CCATTTTATACTGAGCAAGGTCTGCTCCCGG                               |                         |
| <b>CtIP-S679A-F</b>  | GATACAAAGGATGGCGCTCAGTCAAATTAGG                               |                         |
| <b>CtIP-S679A-R</b>  | CCTAATTTTGACTGAGCGCCATCCTTTGTATC                              |                         |
| <b>CtIP-S745A-F</b>  | GGCAGACAGTTTCGCCAAGCAGCAGATGAAGAG                             |                         |
| <b>CtIP-S745A-R</b>  | CTCTTCATCTGCTGCTTGGGCGAAACTGTCTGCC                            |                         |
| <b>CtIP-NAHA-F</b>   | CCACTGTCTGGAAGGAGCCGCCAAGAAACAGCCTTTTGAGGAATC                 |                         |
| <b>CtIP-NAHA-R</b>   | GGCGGCTCCTTCCAGACAGTGGTAGAGCTCATCACC AAGG                     |                         |
| <b>HA2-S</b>         | AGCTTGCGGCCCGCCGCCACCATGTACCCCTACGATGTGCCTGACTACGCCACCGGTG    | HindIII NotI AgeI BamHI |
| <b>HA2-AS</b>        | GATCCACCGGTGGCGTAGTCAGGCACATCGTAGGGGTACATGGTGGCGGCCGCCGCA     | HindIII NotI AgeI BamHI |
| <b>MRE11-F</b>       | GGCACCGGTATGAGTACTGCAGATGCACTTGATG                            | AgeI                    |
| <b>MRE11-R</b>       | GGCGGTACCTTATCTTCTATTTCTTCTTAAAGAACTAGTGTCATAAAAGG            | KpnI                    |
| <b>MRE11-H129N-F</b> | GTGTTTAGTATTCATGGCAATAATGACGATCCCACAGGGGCAGATGC               |                         |
| <b>MRE11-H129N-R</b> | GCATCTGCCCTGTGGGATCGTCATTATTGCCATGAATACTAAACAC                |                         |
| <b>MRE11-H63S-F</b>  | GGTGATCTTTTTAGCGAAAATAAGCCCTCAAGGAAAACATTACATACC              |                         |
| <b>MRE11-H63S-R</b>  | GGCTATTTTCGCTAAAAAGATCACCACTAACAAAATAAAATCC                   |                         |
| <b>MRE11-H63N-F</b>  | GGTGATCTTTTTGACGAAAATAAGCCCTCAAGGAAAACATTACATACC              |                         |
| <b>MRE11-H63N-R</b>  | GGCTATTTTCGTCAAAAAGATCACCACTAACAAAATAAAATCC                   |                         |

**Supplementary Table 2: List of DNA oligonucleotides used in this study.** \* indicates the position of the CF680R fluorophore. All oligonucleotides are from Sigma-Aldrich.

### List of primary antibodies used in this study

| Target                     | Clonality  | Clone/Ref. | Raised in | Source                   | Dilution for I.B. | Dilution for I.F. | Dilution for F.C. |
|----------------------------|------------|------------|-----------|--------------------------|-------------------|-------------------|-------------------|
| $\beta$ -ACTIN             | Monoclonal | ab8226     | Mouse     | Abcam                    | 1/5000            |                   |                   |
| $\beta$ -ACTIN             | Monoclonal | MAB1501    | Mouse     | Chemicon                 | 1/200000          |                   |                   |
| CtIP                       | Monoclonal | 14-1       | Mouse     | Richard Baer             | 1/50              |                   |                   |
| $\gamma$ H2AX              | Polyclonal | 2577       | Rabbit    | Cell signaling           | 1/500             | 1/100             | 1/100             |
| $\gamma$ H2AX              | Monoclonal | JBW301     | Mouse     | Millipore                | 1/1000            | 1/2000            |                   |
| H2AX                       | Polyclonal | ab11175    | Rabbit    | Abcam                    | 1/4000            |                   |                   |
| HA-tag                     | Monoclonal | HA-7       | Mouse     | Sigma-Aldrich            |                   | Used for IP       |                   |
| KAP-1                      | Polyclonal | ab10483    | Rabbit    | Abcam                    | 1/5000            |                   |                   |
| PhKAP-1 (S824)             | Polyclonal | IHC-00073  | Rabbit    | Bethyl laboratories      | 1/200             |                   |                   |
| Ku70                       | Monoclonal | N3H10      | Mouse     | Abcam                    | 1/200             |                   |                   |
| Ku80                       | Monoclonal | 111        | Mouse     | Thermo Fisher Scientific | 1/1000            | 1/100             |                   |
| MRE11                      | Monoclonal | 18/MRE11   | Mouse     | BD Biosciences           | 1/1000            |                   |                   |
| PCNA                       | Polyclonal | ab18197    | Rabbit    | Abcam                    |                   | 1/2000            |                   |
| RAD50                      | Monoclonal | 13/B3      | Mouse     | GeneTex                  | 1/500             |                   |                   |
| RAD51                      | Polyclonal | H-92       | Rabbit    | Santa Cruz Biotech.      |                   | 1/200             |                   |
| RPA32                      | Monoclonal | 9H8        | Mouse     | Abcam                    | 1/750             | 1/250             | 1/200             |
| RPA32 PhS4/S8 (P-RPAS4/S8) | Polyclonal | a300-245A  | Rabbit    | Bethyl laboratories      | 1/2000            | 1/2000            |                   |
| RPA70                      | Monoclonal | EPR3472    | Rabbit    | Abcam                    | 1/1000            |                   |                   |

**Supplementary Table 3: List of primary antibodies used in this study.** I.B., Immunoblotting; I.F., Immunofluorescence; F.C., Flow cytometry.

## SUPPLEMENTARY METHODS

### Identification of replicating cells using EdU incorporation

U2OS cells were incubated for 1 h with 10  $\mu$ M 5-ethynyl-2'-deoxyuridine (EdU) in the presence or absence of CPT. At the end of the treatment, cells were pre-extracted with CSK+R as described and fixed.  $\gamma$ H2AX and PCNA detection were performed sequentially and the cells were fixed again after secondary antibody incubation. EdU detection was performed using the EdU click-it kit (Thermo Fisher Scientific) and AlexaFluor647 azide, using manufacturer's instructions. Pictures were acquired on an Olympus FV1000 confocal microscope using a 60x UPlanSApo/1.35 oil objective (Olympus).

### DNA manipulations

pICE is a synthetic plasmid conferring puromycin resistance and allowing doxycycline-inducible expression of cDNAs in T-REx cells. The empty pICE control plasmid has been described before (Addgene plasmid #46960)<sup>1</sup>. pICE-HA1 and pICE-HA2 were generated respectively by cloning annealed primers HA1-S/HA1-AS and HA2-S/HA2-AS into pICE digested by HindIII/BamHI. To generate **pICE-HA-CtIP-siR-WT (Addgene #82030)**, siRNA-resistant CtIP sequence was amplified by PCR using pEGFP-C1-CtIP<sup>2</sup> as a template and CtIP-F and CtIP-R as primers. The resulting PCR product was digested by BamHI/MluI and cloned into pICE-HA1 digested by the same enzymes. **pICE-HA-CtIP-siR-S $\rightarrow$ A (Addgene #82031)** was generated by sequentially mutating CtIP cDNA using pICE-HA-CtIP-siR-WT as original template and primer pairs CtIP-F/CtIP-S664A-R, CtIP-S664A-F/CtIP-R for S664, CtIP-F/CtIP-S679A-R and CtIP-S679A-F/CtIP-R for S679, and CtIP-F/CtIP-S745A-R and CtIP-S745A-F/CtIP-R for S745. The resulting PCR products were fused together using primers CtIP-F/CtIP-R, digested by BamHI/MluI and cloned into pICE-HA1 digested by the

same enzymes. To generate **pICE-HA-CtIP-siR-N289AH290A (Addgene #82032)**, CtIP cDNA was amplified using primer pairs CtIP-F/CtIP-NAHA-R and CtIP-NAHA-F/CtIP-R. The resulting PCR products were fused together using primers CtIP-F/CtIP-R, digested by BamHI/MluI and cloned into pICE-HA1 digested by the same enzymes. To generate **pICE-HA-MRE11-WT (Addgene #82033)**, MRE11 cDNA (IMAGE clone 5181691) was amplified using MRE11-F and MRE11-R primers. The resulting PCR product was digested by AgeI/KpnI and cloned into pICE-HA2 digested by the same enzymes. To generate **pICE-HA-MRE11-H129N (Addgene #82034)**, **pICE-HA-MRE11-H63S (Addgene #82035)** and **pICE-HA-MRE11-H63N (Addgene #82036)**, MRE11 cDNA was amplified using primer pairs MRE11-F/MRE11-H129N-R and MRE11-H129N-F/MRE11-R for MRE11-H129N, MRE11-F/MRE11-H63S-R and MRE11-H63S-F/MRE11-R for MRE11-H63S and MRE11-F/MRE11-H63N-R and MRE11-H63N-F/MRE11-R for MRE11-H63N. The pair of resulting PCR products were fused together by PCR using MRE11-F and MRE11-R as primers. The resulting PCR products were digested by AgeI/KpnI and cloned into pICE-HA2 digested by the same enzymes.

## SUPPLEMENTARY REFERENCES

- 1 Britton, S., Coates, J. & Jackson, S. P. A new method for high-resolution imaging of Ku foci to decipher mechanisms of DNA double-strand break repair. *J Cell Biol* **202**, 579-595 (2013).
- 2 Sartori, A. A. *et al.* Human CtIP promotes DNA end resection. *Nature* **450**, 509-514 (2007).
